# Supplementary material
Source: PubMed Central journal article supplement (PMC10311284)
Supplement: NIHMS1903124-supplement-1.pdf [file NIHMS1903124-supplement-1.pdf]

**Methods S1. Media and purine overlay formulations used for growth and assessments of purine utilization, related to STAR Methods.**

Media formulations

**METHOD: 11E rich medium with glucose + maltose (2X)**

| <b>Component</b>                                                                                                 | <b>Amount</b> | <b>[1× Medium]</b> | <b>Notes/Comments</b>  |
|------------------------------------------------------------------------------------------------------------------|---------------|--------------------|------------------------|
| Tap distilled H <sub>2</sub> O                                                                                   | 200 ml        |                    |                        |
| 1 M K <sub>x</sub> H <sub>x</sub> PO <sub>4</sub> , pH 7.2                                                       | 30 ml         | 60 mM              |                        |
| Tryptone                                                                                                         | 8.0 g         |                    | BD 211921              |
| Yeast Extract                                                                                                    | 4.0 g         |                    | Fisher Sci. BP1422     |
| Meat Extract                                                                                                     | 4.0 g         |                    | HiMedia RM003          |
| Tween 80 (25% soln.)                                                                                             | 0.5 ml        |                    | >Optional              |
| 0.025% Resazurin                                                                                                 | 1.0 ml        |                    |                        |
| NaAcetate·3H <sub>2</sub> O                                                                                      | 1.7 g         | 25 mM              |                        |
| D-(+)-Glucose<br>FW = 180.16                                                                                     | 1.35 g        | 15 mM              |                        |
| Maltose FW = 342.3                                                                                               | 1.71          | 10 mM              |                        |
| [L-Lysine·2HCl<br>FW = 219.11                                                                                    | 2.75 g]       | 25 mM              | >Optional; as required |
| NaHCO <sub>3</sub> FW = 84.0                                                                                     | 1.05 g        | 25 mM              |                        |
| Histidine-Hematin soln.                                                                                          | 0.25 ml       |                    |                        |
| ATCC Vitamin soln.<br>(MD-VS)                                                                                    | 2.5 ml        |                    |                        |
| Adjust pH to <u>~7.2</u> + ~350 µl 10N<br>NaOH                                                                   |               |                    |                        |
| 5 mM FeSO <sub>4</sub> ·7H <sub>2</sub> O                                                                        | 0.25 ml       | 2.5 µM             |                        |
| Adjust volume = <b>250 ml</b>                                                                                    |               |                    |                        |
| L-cysteine                                                                                                       | 0.25 g        |                    |                        |
| Immediately filter sterilize medium; place in anaerobic glove chamber, loosen cap overnight, then retighten cap. |               |                    |                        |
| <u>1x medium:</u> Combine with equal volume sterile anaerobic water.                                             |               |                    |                        |
| <u>Plates:</u> Combine with equal volume 2.4% agar.                                                              |               |                    |                        |

**METHOD: #23B medium (2×) for liquid cultures**

| Component                                                                                                                                                                                                                                                                                                                                                                                                                             | Amount | [Medium]      | Notes/Comments |
|---------------------------------------------------------------------------------------------------------------------------------------------------------------------------------------------------------------------------------------------------------------------------------------------------------------------------------------------------------------------------------------------------------------------------------------|--------|---------------|----------------|
| Milli-Q H <sub>2</sub> O                                                                                                                                                                                                                                                                                                                                                                                                              | 400 ml | <b>per 1×</b> |                |
| 1 M K <sub>x</sub> PO <sub>4</sub> , pH 7.2                                                                                                                                                                                                                                                                                                                                                                                           | 50 ml  | 50 mM         |                |
| 0.025% Resazurin                                                                                                                                                                                                                                                                                                                                                                                                                      | 2.0 ml |               |                |
| Yeast Extract                                                                                                                                                                                                                                                                                                                                                                                                                         | 1.0 g  | 0.10%         |                |
| NaAcetate·3H <sub>2</sub> O FW 136                                                                                                                                                                                                                                                                                                                                                                                                    | 3.4 g  | 25 mM         |                |
| NaCl FW 58.44                                                                                                                                                                                                                                                                                                                                                                                                                         | 1.46 g | 25 mM         |                |
| 0.5 M K <sub>2</sub> SO <sub>4</sub>                                                                                                                                                                                                                                                                                                                                                                                                  | 1.0 ml | 0.5 mM        |                |
| 1.0 M MgCl <sub>2</sub> ·6H <sub>2</sub> O                                                                                                                                                                                                                                                                                                                                                                                            | 1.0 ml | 1 mM          |                |
| 1.0 M CaCl <sub>2</sub> ·2H <sub>2</sub> O                                                                                                                                                                                                                                                                                                                                                                                            | 0.5 ml | 0.5 mM        |                |
| NaHCO <sub>3</sub> FW = 84.0                                                                                                                                                                                                                                                                                                                                                                                                          | 1.68 g | 20 mM         |                |
| "2x" Vit. K <sub>1</sub> + K <sub>3</sub> soln.                                                                                                                                                                                                                                                                                                                                                                                       | 125 µl |               |                |
| ATCC Vitamin Mixture<br>(MD – VS)                                                                                                                                                                                                                                                                                                                                                                                                     | 10 ml  |               |                |
| Adjust pH @ 7.0<br>~600 µl 10N NaOH →<br>pH 7.23                                                                                                                                                                                                                                                                                                                                                                                      |        |               |                |
| "50×" Trace Minerals                                                                                                                                                                                                                                                                                                                                                                                                                  | 5.0 ml |               |                |
| 5 mM FeSO <sub>4</sub> ·7H <sub>2</sub> O                                                                                                                                                                                                                                                                                                                                                                                             | 1.0 ml | 5 µM          |                |
| Add Milli-Q H <sub>2</sub> O to:                                                                                                                                                                                                                                                                                                                                                                                                      | 500 ml |               |                |
| L-cysteine·HCl FW 174.63                                                                                                                                                                                                                                                                                                                                                                                                              | 0.88 g | 5 mM          |                |
| Immediately filter sterilize medium; place in anaerobic glove chamber, loosen cap overnight, then retighten cap.                                                                                                                                                                                                                                                                                                                      |        |               |                |
| To prepare cultures combine 1:1 with anaerobic, sterile water. Add stocks of carbohydrates and NH <sub>4</sub> Cl as required.                                                                                                                                                                                                                                                                                                        |        |               |                |
| To prepare cultures for purine catabolism, introduce purine (e.g., 12 mg uric acid) into 125 × 16 mm Hungate tubes, transfer into the anaerobic chamber and allow deoxygenation (overnight). Then add 5 ml Milli-Q purified anaerobic water, seal tubes and autoclave (121°C/20 minutes). Vortex vigorously when removed from the autoclave to disperse substrate, allow to cool, then introduce 5 ml sterile medium/tube by syringe. |        |               |                |

**METHOD: #26B medium for plates**

| Component                                                                                                        | Amount  | [Medium] | Notes/Comments        |
|------------------------------------------------------------------------------------------------------------------|---------|----------|-----------------------|
| Milli-Q H <sub>2</sub> O                                                                                         | 800 ml  |          | [Plates = Medium × ½] |
| 1 M K <sub>x</sub> H <sub>x</sub> PO <sub>4</sub> , pH 7.2                                                       | 50 ml   | 50 mM    | 25 mM                 |
| 0.025% Resazurin                                                                                                 | 2.0 ml  |          |                       |
| Tricine FW 179.2                                                                                                 | 0.72 g  | 4 mM     | 2 mM                  |
| Yeast Extract                                                                                                    | 2.0 g   | 0.20%    | 0.10%                 |
| NaAcetate·3H <sub>2</sub> O FW 136                                                                               | 3.4 g   | 25 mM    | 12.5 mM               |
| NaCl FW 58.44                                                                                                    | 1.46 g  | 25 mM    | 12.5 mM               |
| 0.5 M K <sub>2</sub> SO <sub>4</sub>                                                                             | 1.0 ml  | 0.5 mM   | 0.25 mM               |
| 1.0 M MgCl <sub>2</sub> ·6H <sub>2</sub> O                                                                       | 1.0 ml  | 1 mM     | 0.50 mM               |
| 1.0 M CaCl <sub>2</sub> ·2H <sub>2</sub> O                                                                       | 0.5 ml  | 0.5 mM   | 0.25 mM               |
| NaHCO <sub>3</sub> FW = 84.0                                                                                     | 1.68 g  | 20 mM    | 10 mM                 |
| "2x" Vit. K <sub>1</sub> + K <sub>3</sub> soln.                                                                  | 126 µl  |          |                       |
| ATCC Vitamin Mixture<br>(MD – VS)                                                                                | 10 ml   |          |                       |
| Adjust pH To 7.3 (@6.99)<br>~ 600 ul 10N NaOH →pH 7.27                                                           |         |          |                       |
| Add Milli-Q water to:                                                                                            | 1000 ml |          |                       |
| "500x" TM #4                                                                                                     | 2.0 ml  |          |                       |
| 5 mM FeSO <sub>4</sub> ·7H <sub>2</sub> O                                                                        | 1.0 ml  | 5 µM     | 2.5 µM                |
| 5 mM Mo                                                                                                          | 2.0 ml  | 10 µM    | 5.0 µM                |
| 1 mM Se                                                                                                          | 1.0 ml  | 1 µM     | 0.5 µM                |
| L-cysteine·HCl FW 175.64                                                                                         | 0.88 g  | 5 mM     | 2.5 mM                |
| Immediately filter sterilize medium; place in anaerobic glove chamber, loosen cap overnight, then retighten cap. |         |          |                       |
| Combine in the ratio of 1:1 with sterile, molten 2.4% Bacto Agar.                                                |         |          |                       |

**METHOD: #26B-All medium for monolayer plates containing allantoin**

| Component                                                                                                                                    | Amount   | [Medium] | Notes/Comments                  |
|----------------------------------------------------------------------------------------------------------------------------------------------|----------|----------|---------------------------------|
| Milli-Q H <sub>2</sub> O                                                                                                                     | 440 ml   |          | [Plates = Medium × 3/4]         |
| 1 M K <sub>x</sub> H <sub>x</sub> PO <sub>4</sub> , pH 7.2                                                                                   | 16.7 ml  | 33.4 mM  | 25 mM in plates                 |
| 0.025% Resazurin                                                                                                                             | 0.67 ml  |          |                                 |
| Tricine FW 179.1                                                                                                                             | 0.24 g   | 2.68 mM  | 2 mM                            |
| Yeast Extract                                                                                                                                | 0.67 g   | 0.134%   | 0.10%                           |
| NaAcetate·3H <sub>2</sub> O FW 136                                                                                                           | 1.14 g   | 16.7 mM  | (optional)                      |
| NaCl FW 58.44                                                                                                                                | 0.49 g   | 16.7 mM  | 12.6 mM                         |
| 0.5 M K <sub>2</sub> SO <sub>4</sub>                                                                                                         | 0.333 ml | 0.333 mM | 0.25 mM                         |
| 1.0 M MgCl <sub>2</sub> ·6H <sub>2</sub> O                                                                                                   | 0.333 ml | 0.667 mM | 0.50 mM                         |
| 1.0 M CaCl <sub>2</sub> ·2H <sub>2</sub> O                                                                                                   | 0.167 ml | 0.334 mM | 0.25 mM                         |
| NaHCO <sub>3</sub> FW = 84.0                                                                                                                 | 0.56 g   | 13.33 mM | 10 mM                           |
| "2x" Vit. K <sub>1</sub> + K <sub>3</sub> soln.                                                                                              | 42 ul    |          |                                 |
| Allantoin FW 158.1                                                                                                                           | 4.74 g   | 60 mM    | 45 mM (Alfa Aesar               |
| ATCC Vitamin Mixture<br>(MD – VS)                                                                                                            | 3.33 ml  |          | A15571.30 lot 10199372,<br>98%) |
| Adjust pH to 7.3 (@ 7.06): add ~ 260 µl 10N NaOH, pH --> 7.27                                                                                |          |          |                                 |
| After pH adjustment heat to ~50°C with mixing to fully dissolve Allantoin<br>(microwave 3×30 seconds).                                       |          |          |                                 |
| Add Milli-Q water to:                                                                                                                        | 500 ml   |          |                                 |
| "500x" TM #4                                                                                                                                 | 0.667 ml |          |                                 |
| 5 mM FeSO <sub>4</sub> ·7H <sub>2</sub> O                                                                                                    | 0.333 ml | 3.33 µM  | 2.5 µM                          |
| 5 mM NaMoO <sub>4</sub> ·2H <sub>2</sub> O                                                                                                   | 0.667 ml | 6.67 µM  | 5.0 µM                          |
| 1 mM Na <sub>2</sub> SeO <sub>3</sub>                                                                                                        | 0.333 ml | 0.67 µM  | 0.5 µM                          |
| L-cysteine·HCl FW 175.64                                                                                                                     | 0.30 g   | 3.42 mM  | 2.6 mM                          |
| Immediately filter sterilize medium; place in anaerobic glove chamber, loosen cap overnight,<br>then retighten cap.                          |          |          |                                 |
| Combine in the ratio of 1:3 with sterile, molten 4.8% Bacto Agar.<br>Use promptly; upon prolonged storage some allantoin will recrystallize. |          |          |                                 |

Stock solutions:

1M Potassium Phosphate Buffer, pH 7.2

121.9 g  $K_2HPO_4$  (anhydrous, MW = 174.2) + 40.8 g  $KH_2PO_4$  (anhydrous MW = 136.1) dissolved in ~900 ml Milli-Q  $H_2O$ . Check pH (~7.2), adjust pH to 7.2, adjust volume to 1.0 l.

5 mM  $FeSO_4 \cdot 7H_2O$  (Fisher Scientific #1146-500)

0.139 g in 100 ml  $H_2SO_4$ -acidified MilliQ water (acidify with 4 drops  $H_2SO_4$ ).

5 mM  $Na_2MoO_4 \cdot 2H_2O$  (MP Biomedicals #194863)

0.121 g in 100 ml  $H_2SO_4$ -acidified MilliQ water.

1 mM  $Na_2SeO_3$  (Acros Organics #200730250)

0.0173 g in 100 ml  $H_2SO_4$ -acidified MilliQ water.

"2x" Vitamins  $K_1$  +  $K_3$  solution

0.1 ml viscous liquid vitamin  $K_1$  (Chem-Impex Intl., #00768) dissolved into 10 ml 100% ethanol, + 20 mg vitamin  $K_3$  (Sigma M5625), filter sterilize, store at  $-20^\circ C$ .

Histidine-Hematin solution

1. 0.2 M histidine, pH 8.0: Add 2.1 g histidine-HCl· $H_2O$  (Sigma #H7875) into 40 ml distilled  $H_2O$ . Adjust pH from ~4 to 8.0 with 10N NaOH (just over 1 ml, histidine should dissolve). Adjust the final volume to 50 ml with distilled  $H_2O$ .

2. Mix 12 mg hematin (Sigma #H3281) + 10 ml 0.2 M histidine, pH 8.0. Dissolve by vigorous shaking for several hours. Filter sterilize, store aliquots at  $-20^\circ C$ .

"50x" Trace Minerals (TM)

1000 ml MilliQ water, acidified with 5 drops  $H_2SO_4$ . Store under  $N_2$ , refrigerated.

| Component               | FW    | g      | [Stock]      | Medium<br>(1:200-diluted) |
|-------------------------|-------|--------|--------------|---------------------------|
| $MnCl_2 \cdot 4H_2O$    | 197.9 | 0.2969 | 1500 $\mu M$ | 7.5 $\mu M$               |
| $ZnCl_2$                | 136.3 | 0.0682 | 500          | 2.5                       |
| $CoCl_2 \cdot 6H_2O$    | 237.9 | 0.0476 | 200          | 1.0                       |
| $Na_2MoO_4 \cdot 2H_2O$ | 242.0 | 0.0121 | 50           | 0.25                      |
| $Na_2SeO_3$             | 172.9 | 0.0086 | 50           | 0.25                      |
| $NiCl_2 \cdot 6H_2O$    | 237.7 | 0.0594 | 250          | 1.25                      |
| $Na_2WO_4 \cdot 2H_2O$  | 329.9 | 0.0165 | 50           | 0.25                      |

#### Trace Minerals (TM) #4

1000 ml MilliQ water, acidified with 5 drops H<sub>2</sub>SO<sub>4</sub>. Store under N<sub>2</sub>, refrigerated.

| Component                                          | FW    | g      | 5000×[Stock] | 500×[Stock] | Medium<br>(1:500-diluted) |
|----------------------------------------------------|-------|--------|--------------|-------------|---------------------------|
| MnCl <sub>2</sub> ·4H <sub>2</sub> O               | 197.9 | 0.0990 | 500 μM       | 50 μM       | 100 nM                    |
| ZnCl <sub>2</sub>                                  | 136.3 | 0.0682 | 500          | 50          | 100                       |
| CoCl <sub>2</sub> ·6H <sub>2</sub> O               | 237.9 | 0.0595 | 250          | 25          | 50                        |
| NiCl <sub>2</sub> ·6H <sub>2</sub> O               | 237.7 | 0.1188 | 500          | 50          | 100                       |
| Na <sub>2</sub> WO <sub>4</sub> ·2H <sub>2</sub> O | 329.9 | 0.0824 | 250          | 25          | 50                        |

Preparation of top layer overlays for bilayer plates:

#### **Adenine top layer, ~7 ml/plate**

20 ml tap distilled H<sub>2</sub>O plus:

1.0 ml of 1M stock potassium phosphate buffer, pH 7.2

**0.55 g Adenine** (Alfa Aesar A14906, 99%)

pH measured at 7.2

0.56 g Bacto Agar (in 40 ml, = 1.4%)

#### **Hypoxanthine top layer, ~7 ml/plate**

20 ml tdH<sub>2</sub>O plus:

1.0 ml of 1M stock potassium phosphate buffer, pH 7.2

**0.52 g Hypoxanthine** (Thermo Scientific A11481.06, 99%)

pH measured at 7.2

0.56 g Bacto Agar (in 40 ml, = 1.4%)

#### **Uric Acid top layer, ~7 ml/plate**

20 ml tap distilled H<sub>2</sub>O plus:

1.0 ml of 1M stock potassium phosphate buffer, pH 7.2

**0.48 g Uric Acid** (Sigma-Aldrich U0881-100G Pcode 102408543, ≥99%)

pH measured at 7.0

0.56 g Bacto Agar (in 40 ml, = 1.4%)

Autoclave 20 min./121°C, then mix rapidly while cooling to evenly disperse purine. To prepare overlay: under anaerobic conditions add 20 ml medium 26B, mix well and transfer 7 ml onto base layer medium. Mix well between each addition to keep purine suspension uniform.
